# Supplementary material for: Nobiletin Delays Aging and Enhances Stress Resistance of Caenorhabditis elegans
Source: PubMed Central journal article supplement (PMC6981590; doi:10.3390/ijms21010341), 2020-01-04
Supplement: ijms-21-00341-s001.pdf [file ijms-21-00341-s001.pdf]

Supplementary

**Table S1. Primers used for quantitative RT-PCR analysis**

| <b>Gene</b>     | <b>Forward Primer ( 5'-3' )</b> | <b>Reverse Primer ( 5'-3' )</b> |
|-----------------|---------------------------------|---------------------------------|
| <i>actin-1</i>  | TCGGTATGGGACAGAAGGAC            | CATCCCAGTTGGTGACGATA            |
| <i>sod-3</i>    | GGCTAAGGATGGTGGAGAAC            | ACAGGTGGCGATCTTCAAG             |
| <i>gst-4</i>    | ATGCTCGTGCTCTTGCTGAG            | GACTGACCGAATTGTTCTCCAT          |
| <i>hsp-16.2</i> | CTGCAGAATCTCTCCATCTGAGTC        | AGATTCGAAGCAACTGCACC            |
| <i>skn-1</i>    | CACTACCGACGTCAATTTATGGAGTGTCG   | ATGAAGAAGGAAGATGTTTTGTCGTGATCCG |
| <i>sek-1</i>    | ATTGCCGATGGAAAGTGG              | TCATTGATAAACCGAGCC              |
| <i>sir-2.1</i>  | ACTGAGATGCTCCATGACAATAAG        | GCAAGACGAACCCACACGAAC           |
